# Supplementary material for: Personal Social Capital and Self-Rated Health among Middle-Aged and Older Adults: A Cross-sectional Study Exploring the Roles of Leisure-Time Physical Activity and Socioeconomic Status
Source: Research Square preprint supplement (doi:10.21203/rs.3.rs-46055/v4), 2020-12-17
Supplement: Supplementary file 1 [file 86d05f90fe4c1bba485b9b9b.docx]

**Supplement Table 1.**

The Results of Hierarchical Logistic Regression Analyses Predicting the Likelihood of Reporting ‘Good’ Self-rated Health Among Low Household Income Group (*n* = 200)

|  | Model 1 | Model 2 | Model 3 | Model 4 |
| --- | --- | --- | --- | --- |
| OR (95% CI) | OR (95% CI) | OR (95% CI) | OR (95% CI) |
| Personal social capital |  |  |  |  |
| Bonding social capital | 1.17* (1.08-1.26) | 1.18* (1.03 – 1.36) | 1.18* (1.02 – 1.36) | 1.18* (1.02 – 1.37) |
| Bridging social capital | 1.04 (0.98-1.12) | 1.19* (1.03 – 1.36) | 1.19* (1.04 – 1.37) | 1.19* (1.03 – 1.37) |
| Demographic variables |  |  |  |  |
| Age (ref: <60 years) |  | 1.92 (0.90 – 4.10) | 1.94 (0.91 – 4.17) | 1.99 (0.92 – 4.30) |
| Gender (ref: male) |  | 3.49* (1.38 – 8.84) | 3.48* (1.37 – 8.85) | 3.64* (1.41 – 9.39) |
| Race/ethnicity (ref: white) |  | 1.44 (0.58 – 3.53) | 1.40 (0.56 – 3.51) | 1.37 (0.54 – 3.47) |
| Marital status (ref: single or no partnership) |  | 1.55 (0.72 – 3.32) | 1.55 (0.72 – 3.34) | 1.70 (0.78 – 3.71) |
| Chronic diseases (ref: no) |  |  |  |  |
| Yes, one |  | 0.50 (0.22 – 1.15) | 0.52 (0.22 – 1.19) | 0.50 (0.21 – 1.16) |
| Yes, one or more |  | 0.08* (0.03 – 0.22) | 0.08* (0.03 – 0.23) | 0.08* (0.03 – 0.23) |
| *P*-for-liner trends |  | <.001 | <.001 | <.001 |
| LTPA (ref.: no-LTPA) |  |  |  |  |
| <600 MET-mins/wk |  |  | 0.85 (0.36 – 2.00) | 0.81 (0.34 – 1.94) |
| ≥600 MET-mins/wk |  |  | 1.05 (0.43 – 2.56) | 1.02 (0.42 – 2.49) |
| *P*-for-liner trends |  |  | .909 | .969 |
| Education (ref: low) |  |  |  |  |
| Middle |  |  |  | 0.75 (0.34 – 1.67) |
| High |  |  |  | 1.90 (0.61 – 5.95) |
| *P*-for-liner trends |  |  |  | .271 |
| Nagelkerke-*R2* | .145 | .359 | .360 | .375 |
| Goodness of Fit (*P-*value) a | .230 | .507 | .712 | .709 |

OR = odds ratios; CI = confidence intervals; LTPA = leisure-time physical activity; MET = metabolic equivalent tasks

a *P*-value from the Hosmer-Lemeshow goodness-of-fit test

* *P* <.05

**Supplement Table 2.**

The Results of Hierarchical Logistic Regression Analyses Predicting the Likelihood of Reporting ‘Good’ Self-rated Health Among Middle Household Income Group (*n* = 252)

|  | Model 1 | Model 2 | Model 3 | Model 4 |
| --- | --- | --- | --- | --- |
| OR (95% CI) | OR (95% CI) | OR (95% CI) | OR (95% CI) |
| Personal social capital |  |  |  |  |
| Bonding social capital | 1.11 (0.98 – 1.27) | 1.07 (0.92 – 1.25) | 1.05 (0.90 – 1.22) | 1.04 (0.90 – 1.22) |
| Bridging social capital | 0.95 (0.85 – 1.06) | 0.97 (0.86 – 1.09) | 0.99 (0.87 – 1.12) | 0.98 (0.86 – 1.11) |
| Demographic variables |  |  |  |  |
| Age (ref: <60 years) |  | 1.94 (0.97 – 3.88) | 2.17* (1.05 – 4.47) | 2.07* (1.00 – 4.28) |
| Gender (ref: male) |  | 1.48 (0.70 – 3.13) | 1.69 (0.77 – 3.67) | 1.64 (0.75 – 3.59) |
| Race/ethnicity (ref: white) |  | 0.75 (0.31 – 1.84) | 0.75 (0.29 – 1.92) | 0.68 (0.26 – 1.76) |
| Marital status (ref: single or no partnership) |  | 0.85 (0.43 – 1.68) | 0.86 (0.43 – 1.72) | 0.88 (0.44 – 1.79) |
| Chronic diseases (ref: no) |  |  |  |  |
| Yes, one |  | 0.40* (0.18 – 0.89) | 0.37* (0.16 – 0.85) | 0.37* (0.16 – 0.86) |
| Yes, one or more |  | 0.10* (0.04 – 0.22) | 0.09* (0.04 – 0.22) | 0.09* (0.04 – 0.21) |
| *P*-for-liner trends |  | <.001 | <.001 | <.001 |
| LTPA (ref.: no-LTPA) |  |  |  |  |
| <600 MET-mins/wk |  |  | 0.75 (0.33 – 1.71) | 0.71 (0.31 – 1.63) |
| ≥600 MET-mins/wk |  |  | 2.50* (1.13 – 5.53) | 2.38* (1.07 – 5.29) |
| *P*-for-liner trends |  |  | .024 | .033 |
| Education (ref: low) |  |  |  |  |
| Middle |  |  |  | 0.92 (0.39 – 2.21) |
| High |  |  |  | 1.62 (0.62 – 4.21) |
| *P*-for-liner trends |  |  |  | .322 |
| Nagelkerke-*R2* | .015 | .223 | .265 | .276 |
| Goodness of Fit (*P-*value) a | .863 | .125 | .368 | .600 |

OR = odds ratios; CI = confidence intervals; LTPA = leisure-time physical activity; MET = metabolic equivalent tasks

a *P*-value from the Hosmer-Lemeshow goodness-of-fit test

* *P* <.05

**Supplement Table 3.**

The Results of Hierarchical Logistic Regression Analyses Predicting the Likelihood of Reporting ‘Good’ Self-rated Health Among High Household Income Group (*n* = 210)

|  | Model 1 | Model 2 | Model 3 | Model 4 |
| --- | --- | --- | --- | --- |
| OR (95% CI) | OR (95% CI) | OR (95% CI) | OR (95% CI) |
| Personal social capital |  |  |  |  |
| Bonding social capital | 0.98 (0.81 – 1.20) | 0.96 (0.78 – 1.20) | 0.96 (0.77 – 1.19) | 0.95 (0.76 – 1.19) |
| Bridging social capital | 1.22* (1.03 – 1.45) | 1.25* (1.04 – 1.50) | 1.26* (1.04 – 1.51) | 1.29* (1.06 – 1.56) |
| Demographic variables |  |  |  |  |
| Age (ref: <60 years) |  | 2.70* (1.00 – 7.32) | 2.57 (0.94 – 7.02) | 2.69 (0.97 – 7.44) |
| Gender (ref: male) |  | 1.47 (0.53 – 4.06) | 1.57 (0.56 – 4.40) | 1.55 (0.55 – 4.41) |
| Race/ethnicity (ref: white) |  | 0.81 (0.2 – 3.22) | 0.81 (0.20 – 3.37) | 0.87 (0.20 – 3.75) |
| Marital status (ref: single or no partnership) |  | 0.51 (0.15 – 1.77) | 0.52 (0.15 – 1.85) | 0.50 (0.14 – 1.80) |
| Chronic diseases (ref: no) |  |  |  |  |
| Yes, one |  | 0.16* (0.05 – 0.53) | 0.17* (0.05 – 0.55) | 0.16* (0.05 – 0.54) |
| Yes, one or more |  | 0.08* (0.02 – 0.30) | 0.08* (0.02 – 0.31) | 0.07* (0.02 – 0.31) |
| *P*-for-liner trends |  | <.001 | <.001 | <.001 |
| LTPA (ref.: no-LTPA) |  |  |  |  |
| <600 MET-mins/wk |  |  | 2.07 (0.61 – 7.06) | 1.95 (0.56 – 6.79) |
| ≥600 MET-mins/wk |  |  | 1.79 (0.64 – 5.05) | 1.66 (0.58 – 4.77) |
| *P*-for-liner trends |  |  | 0.269 | .343 |
| Education (ref: low) |  |  |  |  |
| Middle |  |  |  | 1.86 (0.29 – 11.90) |
| High |  |  |  | 1.14 (0.20 – 6.44) |
| *P*-for-liner trends |  |  |  | .879 |
| Nagelkerke-*R2* | .068 | .232 | .246 | .254 |
| Goodness of Fit (*P-*value) a | .650 | .256 | .359 | .719 |

OR = odds ratios; CI = confidence intervals; LTPA = leisure-time physical activity; MET = metabolic equivalent tasks

a *P*-value from the Hosmer-Lemeshow goodness-of-fit test

* *P* <.05
